# Supplementary material for: Natural Small-Molecule-Based Carrier-Free Self-Assembly Library Originated from Traditional Chinese Herbal Medicine
Source: PubMed Central journal article supplement — ACS Omega. 2022 Nov 20;7(48):43510–21. doi: 10.1021/acsomega.2c04098 (PMC9730315; doi:10.1021/acsomega.2c04098), 2022-11-20
Supplement: ao2c04098_si_001.pdf [file ao2c04098_si_001.pdf]

## **Supporting information**

### **Natural small molecule-based carrier-free self-assembly library originated from traditional Chinese herb medicine**

Xiaoyu Lin, Xuemei Huang, Xuehao Tian, Zihua Yuan, Jihui Lu, Xueqiang Nie, Pengli Wang, Haimin Lei, Penglong Wang\*

School of Chinese Pharmacy, Beijing University of Chinese Medicine, Beijing 102488, China

**Table S1 Identification of compounds at supramolecular sites**

| NO. | t <sub>R</sub><br>(min) | Compound                                                   | Formula                                         | Precursor ion      |                      |                       | Fragment ion |          |                                                                                |                                                                              |
|-----|-------------------------|------------------------------------------------------------|-------------------------------------------------|--------------------|----------------------|-----------------------|--------------|----------|--------------------------------------------------------------------------------|------------------------------------------------------------------------------|
|     |                         |                                                            |                                                 | Identity           | Theoretical<br>(m/z) | Experimental<br>(m/z) | Δppm         | (m/z)    |                                                                                |                                                                              |
| 1   | 1.10                    | Sucrose                                                    | C <sub>12</sub> H <sub>22</sub> O <sub>11</sub> | [M-H] <sup>-</sup> | 341.1078             | 341.1091              | 3.81         | 179.0553 | [M-H-C <sub>6</sub> H <sub>10</sub> O <sub>5</sub> ] <sup>-</sup> , 161.0444   | [M-H-C <sub>6</sub> H <sub>12</sub> O <sub>6</sub> ] <sup>-</sup> , 113.0231 |
| 2   | 1.13                    | Glucose                                                    | C <sub>6</sub> H <sub>12</sub> O <sub>6</sub>   | [M-H] <sup>-</sup> | 179.0550             | 179.0553              | 1.67         | 161.0446 | [M-H-H <sub>2</sub> O] <sup>-</sup> , 119.0335                                 | [M-H-C <sub>2</sub> H <sub>4</sub> O <sub>2</sub> ] <sup>-</sup> , 101.0231  |
| 3   | 1.17                    | Quinic acid                                                | C <sub>7</sub> H <sub>12</sub> O <sub>6</sub>   | [M-H] <sup>-</sup> | 191.0550             | 191.0554              | 2.09         | 173.0445 | [M-H-H <sub>2</sub> O] <sup>-</sup> , 127.0389                                 | [M-H-CH <sub>4</sub> O <sub>3</sub> ] <sup>-</sup> , 93.0332                 |
| 4   | 1.20                    | Ribose/<br>Lyxopyranose/<br>Xylose                         | C <sub>5</sub> H <sub>10</sub> O <sub>5</sub>   | [M-H] <sup>-</sup> | 149.0444             | 149.0444              | 0.00         | 131.0337 | [M-H-H <sub>2</sub> O] <sup>-</sup>                                            |                                                                              |
| 5   | 1.22                    | Methyl a-D<br>glucopyranoside                              | C <sub>7</sub> H <sub>14</sub> O <sub>6</sub>   | [M-H] <sup>-</sup> | 193.0706             | 193.0710              | 2.07         | 179.0553 | [M-H-CH <sub>2</sub> ] <sup>-</sup> , 133.0495                                 | [M-H-C <sub>2</sub> H <sub>4</sub> O <sub>2</sub> ] <sup>-</sup>             |
| 6   | 1.24                    | Rhamnose                                                   | C <sub>6</sub> H <sub>12</sub> O <sub>5</sub>   | [M-H] <sup>-</sup> | 163.0600             | 163.0600              | 0.00         | 145.0494 | [M-H-H <sub>2</sub> O] <sup>-</sup>                                            |                                                                              |
| 7   | 1.35                    | Malic acid                                                 | C <sub>4</sub> H <sub>6</sub> O <sub>5</sub>    | [M-H] <sup>-</sup> | 133.0131             | 133.0131              | 0.00         | 115.0024 | [M-H-H <sub>2</sub> O] <sup>-</sup> , 71.0123                                  | [M-H-CH <sub>2</sub> O <sub>3</sub> ] <sup>-</sup>                           |
| 8   | 1.52                    | Citric Acid                                                | C <sub>6</sub> H <sub>8</sub> O <sub>7</sub>    | [M-H] <sup>-</sup> | 191.0186             | 191.0190              | 2.09         | 173.0080 | [M-H-H <sub>2</sub> O] <sup>-</sup> , 111.0074                                 | [M-H-CH <sub>4</sub> O <sub>4</sub> ] <sup>-</sup> , 85.0280                 |
| 9   | 2.01                    | Galloylglucose                                             | C <sub>13</sub> H <sub>16</sub> O <sub>10</sub> | [M-H] <sup>-</sup> | 331.0659             | 331.0674              | 4.53         | 169.0132 | [M-H-C <sub>6</sub> H <sub>10</sub> O <sub>5</sub> ] <sup>-</sup> , 125.0232   | [M-H-C <sub>7</sub> H <sub>10</sub> O <sub>7</sub> ] <sup>-</sup>            |
| 10  | 2.34                    | Gallic acid                                                | C <sub>7</sub> H <sub>6</sub> O <sub>5</sub>    | [M-H] <sup>-</sup> | 169.0131             | 169.0133              | 1.18         | 125.0231 | [M-H-CO <sub>2</sub> ] <sup>-</sup>                                            |                                                                              |
| 11  | 3.00                    | Gallic didextrose                                          | C <sub>19</sub> H <sub>26</sub> O <sub>15</sub> | [M-H] <sup>-</sup> | 493.1187             | 493.1201              | 2.83         | 169.0134 | [M-H-C <sub>12</sub> H <sub>20</sub> O <sub>10</sub> ] <sup>-</sup> , 125.0232 | [M-H-C <sub>13</sub> H <sub>20</sub> O <sub>12</sub> ] <sup>-</sup>          |
| 12  | 3.32                    | Pantothenic acid                                           | C <sub>9</sub> H <sub>17</sub> NO <sub>5</sub>  | [M-H] <sup>-</sup> | 218.1022             | 218.1030              | 3.66         | 116.0339 | [M-H-C <sub>5</sub> H <sub>10</sub> O <sub>2</sub> ] <sup>-</sup>              |                                                                              |
| 13  | 3.43                    | 3-hydroxy-4-methoxybenzoic acid<br>3-O-β-D-glucopyranoside | C <sub>14</sub> H <sub>18</sub> O <sub>9</sub>  | [M-H] <sup>-</sup> | 329.0867             | 329.0881              | 3.95         | 167.0342 | [M-H-C <sub>6</sub> H <sub>10</sub> O <sub>5</sub> ] <sup>-</sup>              |                                                                              |

|    |      |                             |                                                 |                    |          |          |      |                                                                                                                                                                                                                                                                                                                                                                                                                                                                                                                                               |
|----|------|-----------------------------|-------------------------------------------------|--------------------|----------|----------|------|-----------------------------------------------------------------------------------------------------------------------------------------------------------------------------------------------------------------------------------------------------------------------------------------------------------------------------------------------------------------------------------------------------------------------------------------------------------------------------------------------------------------------------------------------|
| 14 | 3.99 | Catechin-5-O-glucoside      | C <sub>21</sub> H <sub>24</sub> O <sub>11</sub> | [M-H] <sup>-</sup> | 451.1234 | 451.1251 | 3.76 | 289.0717 [M-H-C <sub>6</sub> H <sub>10</sub> O <sub>5</sub> ] <sup>-</sup> , 245.0818 [M-H-C <sub>7</sub> H <sub>10</sub> O <sub>7</sub> ] <sup>-</sup>                                                                                                                                                                                                                                                                                                                                                                                       |
| 15 | 4.74 | Procyanidin B               | C <sub>30</sub> H <sub>26</sub> O <sub>12</sub> | [M-H] <sup>-</sup> | 577.1340 | 577.1359 | 3.29 | 407.0749 [M-H-C <sub>8</sub> H <sub>10</sub> O <sub>4</sub> ] <sup>-</sup> , 289.0713 [M-H-C <sub>15</sub> H <sub>12</sub> O <sub>6</sub> ] <sup>-</sup> , 245.0813 [M-H-C <sub>16</sub> H <sub>12</sub> O <sub>8</sub> ] <sup>-</sup>                                                                                                                                                                                                                                                                                                        |
| 16 | 4.93 | 3-hydroxybenzoic acid       | C <sub>7</sub> H <sub>6</sub> O <sub>3</sub>    | [M-H] <sup>-</sup> | 137.0233 | 137.0234 | 0.72 | 121.0283 [M-H-O] <sup>-</sup>                                                                                                                                                                                                                                                                                                                                                                                                                                                                                                                 |
| 17 | 5.07 | 1,6-Digalloyl glucopyranose | C <sub>20</sub> H <sub>20</sub> O <sub>14</sub> | [M-H] <sup>-</sup> | 483.0769 | 483.0787 | 3.72 | 315.0714 [M-H-C <sub>7</sub> H <sub>4</sub> O <sub>5</sub> ] <sup>-</sup> , 169.0128 [M-H-C <sub>13</sub> H <sub>14</sub> O <sub>9</sub> ] <sup>-</sup> , 125.0231 [M-H-C <sub>14</sub> H <sub>14</sub> O <sub>11</sub> ] <sup>-</sup>                                                                                                                                                                                                                                                                                                        |
| 18 | 5.23 | Methyl gallate              | C <sub>8</sub> H <sub>8</sub> O <sub>5</sub>    | [M-H] <sup>-</sup> | 183.0287 | 183.0292 | 2.73 | 124.0153 [M-H-C <sub>2</sub> H <sub>3</sub> O <sub>2</sub> ] <sup>-</sup>                                                                                                                                                                                                                                                                                                                                                                                                                                                                     |
| 19 | 5.26 | 2,5-dihydroxybenzoic acid   | C <sub>7</sub> H <sub>6</sub> O <sub>4</sub>    | [M-H] <sup>-</sup> | 153.0182 | 153.0183 | 0.65 | 109.0283 [M-H-CO <sub>2</sub> ] <sup>-</sup>                                                                                                                                                                                                                                                                                                                                                                                                                                                                                                  |
| 20 | 5.27 | Epi/catechin                | C <sub>15</sub> H <sub>14</sub> O <sub>6</sub>  | [M-H] <sup>-</sup> | 289.0706 | 289.0720 | 4.84 | 271.0615 [M-H-H <sub>2</sub> O] <sup>-</sup> , 245.0818 [M-H-CO <sub>2</sub> ] <sup>-</sup> , 227.0707 [M-H-CH <sub>2</sub> O <sub>3</sub> ] <sup>-</sup> , 203.0708 [M-H-C <sub>3</sub> H <sub>2</sub> O <sub>3</sub> ] <sup>-</sup> , 187.0392 [M-H-C <sub>4</sub> H <sub>6</sub> O <sub>3</sub> ] <sup>-</sup> , 179.3041 [M-H-C <sub>6</sub> H <sub>6</sub> O <sub>2</sub> ] <sup>-</sup> , 165.0183 [M-H- <sup>1,2</sup> A] <sup>-</sup> , 137.0233 [M-H- <sup>1,3</sup> A] <sup>-</sup> , 125.0231 [M-H- <sup>1,4</sup> A] <sup>-</sup> |
| 21 | 5.33 | 3-O-Feruloylquinic acid     | C <sub>17</sub> H <sub>20</sub> O <sub>9</sub>  | [M-H] <sup>-</sup> | 367.1023 | 367.1032 | 2.45 | 193.0500 [M-H-C <sub>7</sub> H <sub>10</sub> O <sub>5</sub> ] <sup>-</sup> , 191.0554 [M-H-C <sub>10</sub> H <sub>8</sub> O <sub>3</sub> ] <sup>-</sup> , 173.0448 [M-H-C <sub>10</sub> H <sub>10</sub> O <sub>4</sub> ] <sup>-</sup> , 149.0597 [M-H-C <sub>8</sub> H <sub>10</sub> O <sub>7</sub> ] <sup>-</sup> , 134.0362 [M-H-C <sub>9</sub> H <sub>13</sub> O <sub>7</sub> ] <sup>-</sup>                                                                                                                                               |
| 22 | 6.19 | Procyanidin B 3"-O-gallate  | C <sub>37</sub> H <sub>30</sub> O <sub>16</sub> | [M-H] <sup>-</sup> | 729.1450 | 729.1473 | 3.24 | 577.1362 [M-H-C <sub>7</sub> H <sub>4</sub> O <sub>4</sub> ] <sup>-</sup> , 289.0721 [M-H-C <sub>22</sub> H <sub>16</sub> O <sub>10</sub> ] <sup>-</sup> , 245.0817 [M-H-C <sub>23</sub> H <sub>16</sub> O <sub>12</sub> ] <sup>-</sup>                                                                                                                                                                                                                                                                                                       |
| 23 | 6.46 | 4-O-Feruloylquinic acid     | C <sub>17</sub> H <sub>20</sub> O <sub>9</sub>  | [M-H] <sup>-</sup> | 367.1023 | 367.1032 | 2.45 | 193.0500 [M-H-C <sub>7</sub> H <sub>10</sub> O <sub>5</sub> ] <sup>-</sup> , 191.0554 [M-H-C <sub>10</sub> H <sub>8</sub> O <sub>3</sub> ] <sup>-</sup> , 173.0447 [M-H-C <sub>10</sub> H <sub>10</sub> O <sub>4</sub> ] <sup>-</sup> , 149.0596 [M-H-C <sub>8</sub> H <sub>10</sub> O <sub>7</sub> ] <sup>-</sup> , 134.0362 [M-H-C <sub>9</sub> H <sub>13</sub> O <sub>7</sub> ] <sup>-</sup>                                                                                                                                               |
| 24 | 6.73 | cinnamoyl glucose           | C <sub>15</sub> H <sub>18</sub> O <sub>7</sub>  | [M-H] <sup>-</sup> | 309.0968 | 309.0968 | 0.00 | 147.0441 [M-H-C <sub>6</sub> H <sub>10</sub> O <sub>5</sub> ] <sup>-</sup>                                                                                                                                                                                                                                                                                                                                                                                                                                                                    |
| 25 | 7.02 | Hydroxycinnamic acid        | C <sub>9</sub> H <sub>8</sub> O <sub>3</sub>    | [M-H] <sup>-</sup> | 163.0389 | 163.0393 | 2.45 | 174.0442 [M-H-O] <sup>-</sup> , 119.0491 [M-H-CO <sub>2</sub> ] <sup>-</sup>                                                                                                                                                                                                                                                                                                                                                                                                                                                                  |
| 26 | 7.14 | Vanillic acid               | C <sub>8</sub> H <sub>8</sub> O <sub>4</sub>    | [M-H] <sup>-</sup> | 167.0338 | 167.0342 | 2.39 | 123.0440 [M-H-CO <sub>2</sub> ] <sup>-</sup>                                                                                                                                                                                                                                                                                                                                                                                                                                                                                                  |

|    |       |                                                          |                                                 |                    |          |          |      |                                                                                                                                                                                                                                                                                                                                                                                                                                                                                              |
|----|-------|----------------------------------------------------------|-------------------------------------------------|--------------------|----------|----------|------|----------------------------------------------------------------------------------------------------------------------------------------------------------------------------------------------------------------------------------------------------------------------------------------------------------------------------------------------------------------------------------------------------------------------------------------------------------------------------------------------|
| 27 | 7.37  | Rhein glucoside                                          | C <sub>21</sub> H <sub>18</sub> O <sub>11</sub> | [M-H] <sup>-</sup> | 445.0765 | 445.0775 | 2.25 | 283.0250 [M-H-C <sub>6</sub> H <sub>10</sub> O <sub>5</sub> ] <sup>-</sup> ;239.0348 [M-H-C <sub>7</sub> H <sub>10</sub> O <sub>7</sub> ] <sup>-</sup> ;211.0396 [M-H-C <sub>8</sub> H <sub>10</sub> O <sub>8</sub> ] <sup>-</sup>                                                                                                                                                                                                                                                           |
| 28 | 7.56  | Epi catechin gallate<br>(-)-Epicatechin-3-O-gallate)     | C <sub>22</sub> H <sub>18</sub> O <sub>10</sub> | [M-H] <sup>-</sup> | 441.0816 | 441.0831 | 3.40 | 331.0472 [M-H-C <sub>6</sub> H <sub>6</sub> O <sub>2</sub> ] <sup>-</sup> ;289.0720 [M-H-C <sub>7</sub> H <sub>4</sub> O <sub>4</sub> ] <sup>-</sup> ;245.0817 [M-H-C <sub>8</sub> H <sub>4</sub> O <sub>5</sub> ] <sup>-</sup> ;179.0340 [M-H-C <sub>13</sub> H <sub>10</sub> O <sub>6</sub> ] <sup>-</sup> ;271.0612,169.0134[M-H-C <sub>7</sub> H <sub>6</sub> O <sub>5</sub> ] <sup>-</sup> ;125.0232 [M-H-C <sub>7</sub> H <sub>6</sub> O <sub>5</sub> - <sup>1,4</sup> A] <sup>-</sup> |
| 29 | 7.65  | Sennoside C/D                                            | C <sub>42</sub> H <sub>40</sub> O <sub>19</sub> | [M-H] <sup>-</sup> | 847.2080 | 847.2097 | 2.00 | 685.1560 [M-H-C <sub>6</sub> H <sub>10</sub> O <sub>5</sub> ] <sup>-</sup>                                                                                                                                                                                                                                                                                                                                                                                                                   |
| 30 | 7.83  | Resveratrol-4'-O-(6"-galloyl)glucoside                   | C <sub>27</sub> H <sub>26</sub> O <sub>12</sub> | [M-H] <sup>-</sup> | 541.1340 | 541.1356 | 2.96 | 313.0568 [M-H-C <sub>14</sub> H <sub>12</sub> O <sub>3</sub> ] <sup>-</sup> ;227.0711 [M-H-C <sub>13</sub> H <sub>14</sub> O <sub>9</sub> ] <sup>-</sup> ;169.0134 [M-H-C <sub>20</sub> H <sub>20</sub> O <sub>7</sub> ] <sup>-</sup> ;151.0027 [M-H-C <sub>20</sub> H <sub>22</sub> O <sub>8</sub> ] <sup>-</sup>                                                                                                                                                                           |
| 31 | 7.85  | Sennoside A/B                                            | C <sub>42</sub> H <sub>38</sub> O <sub>20</sub> | [M-H] <sup>-</sup> | 861.1872 | 861.1890 | 2.09 | 699.1338 [M-H-C <sub>6</sub> H <sub>10</sub> O <sub>5</sub> ] <sup>-</sup> ;386.0994 [M-H-C <sub>22</sub> H <sub>19</sub> O <sub>12</sub> ] <sup>-</sup>                                                                                                                                                                                                                                                                                                                                     |
| 32 | 8.40  | Resveratrol                                              | C <sub>14</sub> H <sub>12</sub> O <sub>3</sub>  | [M-H] <sup>-</sup> | 229.0859 | 229.0868 | 3.92 | 143.0492 [M-H-C <sub>4</sub> H <sub>4</sub> O <sub>2</sub> ] <sup>-</sup>                                                                                                                                                                                                                                                                                                                                                                                                                    |
| 33 | 8.56  | Rhein 1-O-(6'-O-acetyl)-glucoside                        | C <sub>23</sub> H <sub>20</sub> O <sub>12</sub> | [M-H] <sup>-</sup> | 487.0871 | 487.0885 | 2.87 | 283.0249 [M-H-C <sub>8</sub> H <sub>12</sub> O <sub>6</sub> ] <sup>-</sup> ;239.0344 [M-H-C <sub>9</sub> H <sub>12</sub> O <sub>8</sub> ] <sup>-</sup>                                                                                                                                                                                                                                                                                                                                       |
| 34 | 8.57  | Azelaic acid                                             | C <sub>9</sub> H <sub>16</sub> O <sub>4</sub>   | [M-H] <sup>-</sup> | 187.0964 | 187.0968 | 2.13 | 143.1066 [M-H-CO <sub>2</sub> ] <sup>-</sup> ;121.0283 [M-H-C <sub>5</sub> H <sub>6</sub> O] <sup>-</sup>                                                                                                                                                                                                                                                                                                                                                                                    |
| 35 | 8.70  | Aloesin                                                  | C <sub>19</sub> H <sub>22</sub> O <sub>9</sub>  | [M-H] <sup>-</sup> | 393.1180 | 393.1196 | 4.07 | 231.0658 [M-H-C <sub>6</sub> H <sub>10</sub> O <sub>5</sub> ] <sup>-</sup> ;203.0709 [M-H-C <sub>7</sub> H <sub>10</sub> O <sub>6</sub> ] <sup>-</sup>                                                                                                                                                                                                                                                                                                                                       |
| 36 | 8.86  | Aloeemodin glucoside                                     | C <sub>21</sub> H <sub>20</sub> O <sub>11</sub> | [M-H] <sup>-</sup> | 431.0972 | 431.0984 | 2.78 | 269.0456 [M-H-C <sub>6</sub> H <sub>10</sub> O <sub>5</sub> ] <sup>-</sup>                                                                                                                                                                                                                                                                                                                                                                                                                   |
| 37 | 8.97  | 2-Cinnamoyl-1-galloylglucose (2-O-Cinnamoyl-Glucogallin) | C <sub>22</sub> H <sub>22</sub> O <sub>11</sub> | [M-H] <sup>-</sup> | 461.1078 | 461.1094 | 3.46 | 313.0568 [M-H-C <sub>9</sub> H <sub>8</sub> O <sub>2</sub> ] <sup>-</sup> ;169.0133 [M-H-C <sub>15</sub> H <sub>16</sub> O <sub>6</sub> ] <sup>-</sup> ;151.0026 [M-H-C <sub>15</sub> H <sub>18</sub> O <sub>7</sub> ] <sup>-</sup> ;147.0441 [M-H-C <sub>13</sub> H <sub>14</sub> O <sub>9</sub> ] <sup>-</sup>                                                                                                                                                                             |
| 38 | 10.05 | 2-O-Cinnamoyl-1,6-O-galloylglucose                       | C <sub>29</sub> H <sub>26</sub> O <sub>15</sub> | [M-H] <sup>-</sup> | 613.1187 | 613.1206 | 3.09 | 465.0655 [M-H-C <sub>9</sub> H <sub>8</sub> O <sub>2</sub> ] <sup>-</sup> ;313.0558 [M-H-C <sub>16</sub> H <sub>12</sub> O <sub>6</sub> ] <sup>-</sup> ;169.0138 [M-H-C <sub>22</sub> H <sub>20</sub> O <sub>10</sub> ] <sup>-</sup>                                                                                                                                                                                                                                                         |
| 39 | 10.21 | Torachryson                                              | C <sub>14</sub> H <sub>14</sub> O <sub>4</sub>  | [M-H] <sup>-</sup> | 245.0808 | 245.0815 | 2.85 | 230.0566 [M-H-CH <sub>3</sub> ] <sup>-</sup> ;187.0394 [M-H-C <sub>3</sub> H <sub>6</sub> O] <sup>-</sup>                                                                                                                                                                                                                                                                                                                                                                                    |

|    |       |                                                |                                                 |                    |          |          |      |                                                                                                                                                                                                                                                                                                                      |
|----|-------|------------------------------------------------|-------------------------------------------------|--------------------|----------|----------|------|----------------------------------------------------------------------------------------------------------------------------------------------------------------------------------------------------------------------------------------------------------------------------------------------------------------------|
| 40 | 10.22 | Torachryson<br>8-O-glucoside                   | C <sub>20</sub> H <sub>24</sub> O <sub>9</sub>  | [M-H] <sup>-</sup> | 407.1336 | 407.1350 | 3.43 | 245.0817 [M-H-C <sub>6</sub> H <sub>10</sub> O <sub>5</sub> ] <sup>-</sup> ,230.0580 [M-H-C <sub>7</sub> H <sub>13</sub> O <sub>5</sub> ] <sup>-</sup>                                                                                                                                                               |
| 41 | 10.24 | Isovitexin                                     | C <sub>21</sub> H <sub>20</sub> O <sub>10</sub> | [M-H] <sup>-</sup> | 431.0972 | 431.0987 | 3.47 | 268.0378 [M-H-C <sub>6</sub> H <sub>11</sub> O <sub>5</sub> ] <sup>-</sup>                                                                                                                                                                                                                                           |
| 42 | 10.27 | Chrysin                                        | C <sub>15</sub> H <sub>10</sub> O <sub>4</sub>  | [M-H] <sup>-</sup> | 253.0495 | 253.0505 | 3.95 | 225.0555 [M-H-CO] <sup>-</sup>                                                                                                                                                                                                                                                                                       |
| 43 | 10.28 | Chrysophan-1-O-glucoside                       | C <sub>21</sub> H <sub>20</sub> O <sub>9</sub>  | [M-H] <sup>-</sup> | 415.1023 | 415.1037 | 3.37 | 253.0505 [M-H-C <sub>6</sub> H <sub>10</sub> O <sub>5</sub> ] <sup>-</sup> ,225.0555 [M-H-C <sub>7</sub> H <sub>10</sub> O <sub>6</sub> ] <sup>-</sup>                                                                                                                                                               |
| 44 | 10.30 | emodin glucoside                               | C <sub>21</sub> H <sub>20</sub> O <sub>11</sub> | [M-H] <sup>-</sup> | 431.0972 | 431.0984 | 2.78 | 269.0456 [M-H-C <sub>6</sub> H <sub>10</sub> O <sub>5</sub> ] <sup>-</sup>                                                                                                                                                                                                                                           |
| 45 | 10.32 | Aloe-Emodin<br>8-O-(6'-O-acetyl)-<br>glucoside | C <sub>23</sub> H <sub>22</sub> O <sub>11</sub> | [M-H] <sup>-</sup> | 473.1078 | 473.1090 | 2.53 | 268.0369 [M-H-C <sub>8</sub> H <sub>13</sub> O <sub>6</sub> ] <sup>-</sup> ,224.0464 [M-H-C <sub>9</sub> H <sub>13</sub> O <sub>8</sub> ] <sup>-</sup>                                                                                                                                                               |
| 46 | 10.35 | Iso/Lindleyin                                  | C <sub>23</sub> H <sub>26</sub> O <sub>11</sub> | [M-H] <sup>-</sup> | 477.1391 | 477.1392 | 0.20 | 169.0135 [M-H-C <sub>16</sub> H <sub>20</sub> O <sub>6</sub> ] <sup>-</sup> ,125.0231 [M-H-C <sub>17</sub> H <sub>20</sub> O <sub>8</sub> ] <sup>-</sup>                                                                                                                                                             |
| 47 | 10.49 | Chrysophan-8-O-ol<br>glucoside                 | C <sub>21</sub> H <sub>20</sub> O <sub>9</sub>  | [M-H] <sup>-</sup> | 415.1023 | 415.1037 | 3.37 | 253.0506 [M-H-C <sub>6</sub> H <sub>10</sub> O <sub>5</sub> ] <sup>-</sup> ,225.0553 [M-H-C <sub>7</sub> H <sub>10</sub> O <sub>6</sub> ] <sup>-</sup>                                                                                                                                                               |
| 48 | 10.50 | Chrysophanol                                   | C <sub>15</sub> H <sub>10</sub> O <sub>4</sub>  | [M-H] <sup>-</sup> | 253.0495 | 253.0506 | 4.35 | 225.0555 [M-H-CO] <sup>-</sup>                                                                                                                                                                                                                                                                                       |
| 49 | 10.51 | 8-O-Methyl<br>Chrysophanol                     | C <sub>16</sub> H <sub>12</sub> O <sub>4</sub>  | [M-H] <sup>-</sup> | 267.0651 | 267.0657 | 2.24 | 252.0423 [M-H-CH <sub>3</sub> ] <sup>-</sup> ,238.0632 [M-H-C <sub>2</sub> H <sub>5</sub> ] <sup>-</sup>                                                                                                                                                                                                             |
| 50 | 10.77 | Endocrocin                                     | C <sub>16</sub> H <sub>10</sub> O <sub>7</sub>  | [M-H] <sup>-</sup> | 313.0342 | 313.0355 | 4.15 | 269.0456 [M-H-CO <sub>2</sub> ] <sup>-</sup> ,241.0501 [M-H-C <sub>2</sub> O <sub>3</sub> ] <sup>-</sup> ,225.0551 [M-H-C <sub>3</sub> O <sub>5</sub> ] <sup>-</sup>                                                                                                                                                 |
| 51 | 11.09 | Torachryson<br>8-O-(6'-O-acetyl)-<br>glucoside | C <sub>22</sub> H <sub>26</sub> O <sub>10</sub> | [M-H] <sup>-</sup> | 449.1442 | 449.1458 | 1.33 | 245.0815 [M-H-C <sub>8</sub> H <sub>12</sub> O <sub>6</sub> ] <sup>-</sup> ,230.0573 [M-H-C <sub>9</sub> H <sub>15</sub> O <sub>6</sub> ] <sup>-</sup> ,<br>215.0335 [M-H-C <sub>10</sub> H <sub>18</sub> O <sub>6</sub> ] <sup>-</sup> ,183.0398 [M-H-C <sub>11</sub> H <sub>18</sub> O <sub>7</sub> ] <sup>-</sup> |
| 52 | 11.18 | Wogonin (oroxylin<br>A)                        | C <sub>16</sub> H <sub>12</sub> O <sub>5</sub>  | [M-H] <sup>-</sup> | 283.0600 | 283.0612 | 4.24 | 268.0377 [M-H-CH <sub>3</sub> ] <sup>-</sup> ,240.0425 [M-H-C <sub>2</sub> H <sub>5</sub> O] <sup>-</sup>                                                                                                                                                                                                            |
| 53 | 11.20 | Emodin<br>8-O-(6'-O-acetyl)-<br>glucoside      | C <sub>23</sub> H <sub>22</sub> O <sub>11</sub> | [M-H] <sup>-</sup> | 473.1078 | 473.1093 | 3.17 | 268.0378 [M-H-C <sub>8</sub> H <sub>13</sub> O <sub>6</sub> ] <sup>-</sup> ,240.0410 [M-H-C <sub>9</sub> H <sub>13</sub> O <sub>7</sub> ] <sup>-</sup>                                                                                                                                                               |
| 54 | 11.42 | Physcion                                       | C <sub>16</sub> H <sub>12</sub> O <sub>5</sub>  | [M-H] <sup>-</sup> | 283.0600 | 283.0612 | 4.24 | 268.0377 [M-H-CH <sub>3</sub> ] <sup>-</sup> ,240.0425 [M-H-C <sub>2</sub> H <sub>5</sub> O] <sup>-</sup>                                                                                                                                                                                                            |

|    |       |                                                                   |                                                 |                    |          |          |      |                                                                                                                                                                                                                                                                       |
|----|-------|-------------------------------------------------------------------|-------------------------------------------------|--------------------|----------|----------|------|-----------------------------------------------------------------------------------------------------------------------------------------------------------------------------------------------------------------------------------------------------------------------|
| 55 | 11.47 | Physcion glucoside                                                | C <sub>22</sub> H <sub>22</sub> O <sub>10</sub> | [M-H] <sup>-</sup> | 445.1129 | 445.1139 | 2.25 | 283.0612 [M-H-C <sub>6</sub> H <sub>10</sub> O <sub>5</sub> ] <sup>-</sup> ;268.0377 [M-H-C <sub>7</sub> H <sub>13</sub> O <sub>5</sub> ] <sup>-</sup> ;240.0425 [M-H-C <sub>8</sub> H <sub>13</sub> O <sub>6</sub> ] <sup>-</sup>                                    |
| 56 | 11.53 | Chrysophanol<br>1-O-(6'-O-acetyl)-<br>glucoside3-methyl-<br>Rhein | C <sub>23</sub> H <sub>22</sub> O <sub>10</sub> | [M-H] <sup>-</sup> | 457.1129 | 457.1151 | 4.81 | 253.0505 [M-H-C <sub>8</sub> H <sub>12</sub> O <sub>6</sub> ] <sup>-</sup> ;239.0710 [M-H-C <sub>9</sub> H <sub>14</sub> O <sub>6</sub> ] <sup>-</sup>                                                                                                                |
| 57 | 11.55 | Naringenin                                                        | C <sub>15</sub> H <sub>12</sub> O <sub>5</sub>  | [M-H] <sup>-</sup> | 271.0600 | 271.0613 | 4.79 | 177.0184 [M-H-C <sub>6</sub> H <sub>4</sub> O] <sup>-</sup> ;165.0183, 107.0126 [M-H- <sup>1,2</sup> C] <sup>-</sup><br>151.0026, 119.0490 [M-H- <sup>1,3</sup> C] <sup>-</sup> ;93.0332 [M-H-C <sub>9</sub> H <sub>6</sub> O <sub>4</sub> ] <sup>-</sup>             |
| 58 | 12.33 | Calycosin                                                         | C <sub>16</sub> H <sub>11</sub> O <sub>5</sub>  | [M-H] <sup>-</sup> | 283.0600 | 283.0613 | 4.59 | 268.0378 [M-H-CH <sub>3</sub> ] <sup>-</sup> ;240.0425 [M-H-C <sub>2</sub> H <sub>3</sub> O] <sup>-</sup> ;212.0472 [M-H-C <sub>3</sub> H <sub>3</sub> O <sub>2</sub> ] <sup>-</sup>                                                                                  |
| 59 | 12.34 | Physcion<br>8-O(6'-O-acetyl)gl<br>ucoside                         | C <sub>24</sub> H <sub>24</sub> O <sub>11</sub> | [M-H] <sup>-</sup> | 487.1234 | 487.1248 | 2.87 | 283.0613 [M-H-C <sub>8</sub> H <sub>12</sub> O <sub>6</sub> ] <sup>-</sup> ;268.0370 [M-H-C <sub>9</sub> H <sub>15</sub> O <sub>6</sub> ] <sup>-</sup><br>240.0408 [M-H-C <sub>10</sub> H <sub>15</sub> O <sub>7</sub> ] <sup>-</sup>                                 |
| 60 | 12.80 | 3-methyl-Rhein                                                    | C <sub>16</sub> H <sub>10</sub> O <sub>6</sub>  | [M-H] <sup>-</sup> | 297.0393 | 297.0406 | 4.37 | 253.0505 [M-H-CO <sub>2</sub> ] <sup>-</sup> ;225.0553 [M-H-C <sub>2</sub> O <sub>3</sub> ] <sup>-</sup>                                                                                                                                                              |
| 61 | 13.82 | Aloe-emodin                                                       | C <sub>15</sub> H <sub>10</sub> O <sub>5</sub>  | [M-H] <sup>-</sup> | 269.0444 | 269.0456 | 4.46 | 241.0498 [M-H-CO] <sup>-</sup> ;240.0426 [M-H-CHO] <sup>-</sup> ;223.0397 [M-H-CH <sub>2</sub> O <sub>2</sub> ] <sup>-</sup><br>197.0597 [M-H-C <sub>2</sub> O <sub>3</sub> ] <sup>-</sup> ;183.0449 [M-H-C <sub>3</sub> H <sub>2</sub> O <sub>3</sub> ] <sup>-</sup> |
| 62 | 14.17 | 1,8-Dihydroxyanth<br>raquinone                                    | C <sub>14</sub> H <sub>8</sub> O <sub>4</sub>   | [M-H] <sup>-</sup> | 239.0338 | 239.0347 | 3.76 | 211.0396 [M-H-CO] <sup>-</sup> ;183.0444 [M-H-C <sub>2</sub> O <sub>2</sub> ] <sup>-</sup>                                                                                                                                                                            |
| 63 | 14.23 | Rhein                                                             | C <sub>15</sub> H <sub>8</sub> O <sub>6</sub>   | [M-H] <sup>-</sup> | 283.0237 | 283.0249 | 4.24 | 239.0347 [M-H-CO <sub>2</sub> ] <sup>-</sup> ;211.0394 [M-H-C <sub>2</sub> O <sub>3</sub> ] <sup>-</sup> ;183.0443 [M-H-C <sub>3</sub> O <sub>4</sub> ] <sup>-</sup><br>155.0492 [M-H-C <sub>4</sub> O <sub>5</sub> ] <sup>-</sup>                                    |

|    |       |                                                                     |                                                               |                    |          |          |      |                                                                                                                                                                                                                                      |
|----|-------|---------------------------------------------------------------------|---------------------------------------------------------------|--------------------|----------|----------|------|--------------------------------------------------------------------------------------------------------------------------------------------------------------------------------------------------------------------------------------|
| 64 | 16.20 | (4,5-Dihydroxy-9,10-dioxo-9,10-dihydro-2-anthracenyl)methyl acetate | C <sub>17</sub> H <sub>12</sub> O <sub>6</sub>                | [M-H] <sup>-</sup> | 311.0550 | 311.0564 | 4.50 | 283.0610 [M-H-CO] <sup>-</sup> , 267.0658 [M-H-CO <sub>2</sub> ] <sup>-</sup> , 240.0422 [M-H-C <sub>3</sub> H <sub>3</sub> O <sub>2</sub> ] <sup>-</sup>                                                                            |
| 65 | 17.14 | Emodin                                                              | C <sub>15</sub> H <sub>10</sub> O <sub>5</sub>                | [M-H] <sup>-</sup> | 269.0444 | 269.0456 | 4.46 | 241.0502 [M-H-CO] <sup>-</sup> , 225.0552 [M-H-CO <sub>2</sub> ] <sup>-</sup> , 197.0601 [M-H-C <sub>2</sub> O <sub>3</sub> ] <sup>-</sup> , 181.0648 [M-H-C <sub>2</sub> O <sub>4</sub> ] <sup>-</sup>                              |
| 66 | 17.27 | Norwogonin                                                          | C <sub>15</sub> H <sub>10</sub> O <sub>5</sub>                | [M-H] <sup>-</sup> | 269.0444 | 269.0456 | 4.46 | 241.0501 [M-H-CO] <sup>-</sup> , 225.0553 [M-H-CO <sub>2</sub> ] <sup>-</sup>                                                                                                                                                        |
| 67 | 1.13  | Arginine                                                            | C <sub>6</sub> H <sub>14</sub> N <sub>4</sub> O <sub>2</sub>  | [M+H] <sup>+</sup> | 175.1189 | 175.1191 | 1.14 | 116.0710 [M+H-CH <sub>5</sub> N <sub>3</sub> ] <sup>+</sup>                                                                                                                                                                          |
| 68 | 1.15  | Choline                                                             | C <sub>5</sub> H <sub>14</sub> NO <sup>+</sup>                | [M] <sup>+</sup>   | 104.1069 | 104.1074 | 4.79 | -                                                                                                                                                                                                                                    |
| 69 | 1.16  | Valine                                                              | C <sub>5</sub> H <sub>11</sub> NO <sub>2</sub>                | [M+H] <sup>+</sup> | 118.0862 | 118.0864 | 1.69 | -                                                                                                                                                                                                                                    |
| 70 | 1.17  | Proline                                                             | C <sub>5</sub> H <sub>10</sub> NO <sub>2</sub>                | [M+H] <sup>+</sup> | 116.0706 | 116.0709 | 2.58 | 70.0660 [M+H-CH <sub>2</sub> O <sub>2</sub> ] <sup>+</sup>                                                                                                                                                                           |
| 71 | 1.23  | Phenylalanine                                                       | C <sub>9</sub> H <sub>11</sub> NO <sub>2</sub>                | [M+H] <sup>+</sup> | 166.0862 | 166.0862 | 0.00 | 91.0548 [M+H-C <sub>2</sub> H <sub>4</sub> NO <sub>2</sub> ] <sup>+</sup>                                                                                                                                                            |
| 72 | 1.65  | Adenosine                                                           | C <sub>10</sub> H <sub>13</sub> N <sub>5</sub> O <sub>4</sub> | [M+H] <sup>+</sup> | 268.1040 | 268.1040 | 0.00 | 136.0620 [M+H-C <sub>3</sub> H <sub>8</sub> O <sub>4</sub> ] <sup>+</sup>                                                                                                                                                            |
| 73 | 1.76  | Acetophenone                                                        | C <sub>8</sub> H <sub>8</sub> O                               | [M+H] <sup>+</sup> | 121.0647 | 121.0651 | 3.30 | 107.0496 [M+H-CH <sub>2</sub> ] <sup>+</sup>                                                                                                                                                                                         |
| 74 | 3.19  | Caffeic acid                                                        | C <sub>9</sub> H <sub>8</sub> O <sub>4</sub>                  | [M+H] <sup>+</sup> | 181.0495 | 181.0497 | 1.10 | 163.0391 [M+H-H <sub>2</sub> O] <sup>+</sup> , 135.0442 [M+H-CH <sub>2</sub> O <sub>2</sub> ] <sup>+</sup>                                                                                                                           |
| 75 | 3.20  | Danshensu                                                           | C <sub>9</sub> H <sub>10</sub> O <sub>5</sub>                 | [M+H] <sup>+</sup> | 199.0600 | 199.0603 | 1.50 | 181.0497 [M+H-H <sub>2</sub> O] <sup>+</sup> , 163.0391 [M+H-H <sub>4</sub> O <sub>2</sub> ] <sup>+</sup> , 135.0442 [M+H-CH <sub>4</sub> O <sub>3</sub> ] <sup>+</sup>                                                              |
| 76 | 3.84  | protocatechuic acid                                                 | C <sub>7</sub> H <sub>6</sub> O <sub>4</sub>                  | [M+H] <sup>+</sup> | 155.0338 | 155.0339 | 0.64 | 137.0235 [M+H-H <sub>2</sub> O] <sup>+</sup> , 127.0393 [M+H-CO] <sup>+</sup>                                                                                                                                                        |
| 77 | 4.38  | Tryptophan                                                          | C <sub>11</sub> H <sub>12</sub> N <sub>2</sub> O <sub>2</sub> | [M+H] <sup>+</sup> | 205.0971 | 205.0974 | 1.46 | 161.1073 [M+H-CO <sub>2</sub> ] <sup>+</sup> , 144.0810 [M+H-CH <sub>3</sub> NO <sub>2</sub> ] <sup>+</sup>                                                                                                                          |
| 78 | 4.98  | Cryptochlorogenic acid                                              | C <sub>16</sub> H <sub>18</sub> O <sub>9</sub>                | [M+H] <sup>+</sup> | 355.1023 | 355.1028 | 1.40 | 179.0343 [M+H-C <sub>7</sub> H <sub>12</sub> O <sub>5</sub> ] <sup>+</sup> , 163.0392 [M+H-C <sub>7</sub> H <sub>14</sub> O <sub>6</sub> ] <sup>+</sup> , 135.0443 [M+H-C <sub>8</sub> H <sub>14</sub> O <sub>7</sub> ] <sup>+</sup> |
| 79 | 5.13  | Chlorogenic acid                                                    | C <sub>16</sub> H <sub>18</sub> O <sub>9</sub>                | [M+H] <sup>+</sup> | 355.1023 | 355.1026 | 0.84 | 179.0338 [M+H-C <sub>7</sub> H <sub>12</sub> O <sub>5</sub> ] <sup>+</sup> , 163.0391 [M+H-C <sub>7</sub> H <sub>14</sub> O <sub>6</sub> ] <sup>+</sup> , 135.0442 [M+H-C <sub>8</sub> H <sub>14</sub> O <sub>7</sub> ] <sup>+</sup> |

|    |      |                                           |                                                              |                    |          |          |       |                                                                                                                                                                                                                                                                         |
|----|------|-------------------------------------------|--------------------------------------------------------------|--------------------|----------|----------|-------|-------------------------------------------------------------------------------------------------------------------------------------------------------------------------------------------------------------------------------------------------------------------------|
| 80 | 5.24 | Neochlorogenic acid                       | C <sub>16</sub> H <sub>18</sub> O <sub>9</sub>               | [M+H] <sup>+</sup> | 355.1023 | 355.1029 | 1.68  | 179.0339 [M+H-C <sub>7</sub> H <sub>12</sub> O <sub>5</sub> ] <sup>+</sup> ,163.0391 [M+H-C <sub>7</sub> H <sub>14</sub> O <sub>6</sub> ] <sup>+</sup><br>135.0442 [M+H-C <sub>8</sub> H <sub>14</sub> O <sub>7</sub> ] <sup>+</sup>                                    |
| 81 | 5.27 | Magnocurarine                             | C <sub>19</sub> H <sub>24</sub> NO <sub>3</sub> <sup>+</sup> | [M] <sup>+</sup>   | 314.1750 | 314.1748 | -0.63 | 269.1172 [M-C <sub>2</sub> H <sub>7</sub> N] <sup>+</sup> ,237.0918 [M-C <sub>3</sub> H <sub>11</sub> NO] <sup>+</sup> ,209.0962 [M-C <sub>4</sub> H <sub>11</sub> NO <sub>2</sub> ] <sup>+</sup>                                                                       |
| 82 | 5.28 | 3,4-Dihydroxybenz aldehyde                | C <sub>7</sub> H <sub>6</sub> O <sub>3</sub>                 | [M+H] <sup>+</sup> | 139.0389 | 139.0390 | 0.71  | 121.0287 [M+H-H <sub>2</sub> O] <sup>+</sup> ,111.0444 [M+H-CO] <sup>+</sup>                                                                                                                                                                                            |
| 83 | 5.29 | Dihydro-11-hydroxy-stepholidine-glucoside | C <sub>25</sub> H <sub>31</sub> NO <sub>10</sub>             | [M+H] <sup>+</sup> | 506.2020 | 506.2026 | 1.18  | 344.1494 [M+H-C <sub>6</sub> H <sub>10</sub> O <sub>5</sub> ] <sup>+</sup> ,208.0970 [M+H-C <sub>14</sub> H <sub>18</sub> O <sub>7</sub> ] <sup>+</sup><br>190.0864 [M+H-C <sub>14</sub> H <sub>20</sub> O <sub>8</sub> ] <sup>+</sup>                                  |
| 84 | 5.38 | Isoferulic acid                           | C <sub>10</sub> H <sub>10</sub> O <sub>4</sub>               | [M+H] <sup>+</sup> | 195.0651 | 195.0653 | 1.53  | 177.0547 [M+H-H <sub>2</sub> O] <sup>+</sup> ,149.0598 [M+H-CH <sub>2</sub> O <sub>2</sub> ] <sup>+</sup>                                                                                                                                                               |
| 85 | 5.92 | 9-O-Berberine glucoside                   | C <sub>25</sub> H <sub>26</sub> NO <sub>9</sub> <sup>+</sup> | [M] <sup>+</sup>   | 484.1602 | 484.1606 | 0.82  | 322.1083 [M-C <sub>6</sub> H <sub>10</sub> O <sub>5</sub> ] <sup>+</sup> ,308.0924 [M-C <sub>7</sub> H <sub>10</sub> O <sub>6</sub> ] <sup>+</sup>                                                                                                                      |
| 86 | 6.08 | Magnoflorine                              | C <sub>20</sub> H <sub>24</sub> NO <sub>4</sub> <sup>+</sup> | [M] <sup>+</sup>   | 342.1699 | 342.1700 | 0.29  | 297.1122 [M-C <sub>2</sub> H <sub>7</sub> N] <sup>+</sup> ,282.0886 [M-C <sub>3</sub> H <sub>10</sub> N] <sup>+</sup> ,265.0860 [M-C <sub>3</sub> H <sub>11</sub> NO] <sup>+</sup><br>237.0909 [M-C <sub>4</sub> H <sub>11</sub> NO <sub>2</sub> ] <sup>+</sup>         |
| 87 | 6.43 | 11-hydroxy-stepholidine-glucoside         | C <sub>25</sub> H <sub>29</sub> NO <sub>10</sub>             | [M+H] <sup>+</sup> | 504.1864 | 504.1867 | 0.59  | 342.1337 [M+H-C <sub>6</sub> H <sub>10</sub> O <sub>5</sub> ] <sup>+</sup> ,205.0814 [M+H-C <sub>14</sub> H <sub>18</sub> O <sub>7</sub> ] <sup>+</sup><br>188.0707 [M+H-C <sub>14</sub> H <sub>20</sub> O <sub>8</sub> ] <sup>+</sup>                                  |
| 88 | 6.47 | Ferulic acid                              | C <sub>10</sub> H <sub>10</sub> O <sub>4</sub>               | [M+H] <sup>+</sup> | 195.0651 | 195.0653 | 1.53  | 177.0547 [M+H-H <sub>2</sub> O] <sup>+</sup> ,149.0598 [M+H-CH <sub>2</sub> O <sub>2</sub> ] <sup>+</sup>                                                                                                                                                               |
| 89 | 6.61 | Magnoflorine glucoside                    | C <sub>26</sub> H <sub>34</sub> NO <sub>9</sub> <sup>+</sup> | [M] <sup>+</sup>   | 504.2228 | 504.2232 | 0.79  | 342.1702 [M-C <sub>6</sub> H <sub>10</sub> O <sub>5</sub> ] <sup>+</sup> ,297.1120 [M-C <sub>8</sub> H <sub>17</sub> NO <sub>5</sub> ] <sup>+</sup>                                                                                                                     |
| 90 | 6.70 | Rosmarinic acid                           | C <sub>18</sub> H <sub>16</sub> O <sub>8</sub>               | [M+H] <sup>+</sup> | 361.0917 | 361.0917 | 0.00  | 181.0494 [M+H-C <sub>9</sub> H <sub>8</sub> O <sub>4</sub> ] <sup>+</sup> ,163.0391 [M+H-C <sub>9</sub> H <sub>10</sub> O <sub>5</sub> ] <sup>+</sup> ,<br>135.0442 [M+H-C <sub>10</sub> H <sub>10</sub> O <sub>6</sub> ] <sup>+</sup>                                  |
| 91 | 6.74 | 8,9-di-demethyl-epiberberine              | C <sub>18</sub> H <sub>14</sub> NO <sub>4</sub> <sup>+</sup> | [M] <sup>+</sup>   | 308.0917 | 308.0917 | 0.00  | 280.0970 [M-CO] <sup>+</sup> ,278.0815 [M-CH <sub>2</sub> O] <sup>+</sup> ,265.0729 [M-C <sub>2</sub> H <sub>3</sub> O] <sup>+</sup>                                                                                                                                    |
| 92 | 7.08 | Dihydro-columbamine/Dihydro-jatro rhizine | C <sub>20</sub> H <sub>22</sub> NO <sub>4</sub> <sup>+</sup> | [M] <sup>+</sup>   | 340.1543 | 340.1543 | 0.00  | 325.1308 [M-CH <sub>3</sub> ] <sup>+</sup> ,324.1229 [M-CH <sub>4</sub> ] <sup>+</sup> ,310.1069 [M-C <sub>2</sub> H <sub>6</sub> ] <sup>+</sup><br>308.1284 [M-C <sub>2</sub> H <sub>8</sub> ] <sup>+</sup> ,280.1331 [M-C <sub>2</sub> H <sub>4</sub> O] <sup>+</sup> |



|     |      |                                |                                                              |                    |          |          |       |                                                                                                                                                                                                                                                                                  |
|-----|------|--------------------------------|--------------------------------------------------------------|--------------------|----------|----------|-------|----------------------------------------------------------------------------------------------------------------------------------------------------------------------------------------------------------------------------------------------------------------------------------|
| 93  | 7.10 | 8-Oxocoptisine                 | C <sub>19</sub> H <sub>13</sub> NO <sub>5</sub>              | [M+H] <sup>+</sup> | 336.0866 | 336.0866 | 0.00  | 318.0761 [M+H-H <sub>2</sub> O] <sup>+</sup> ,308.0916 [M+H-CO] <sup>+</sup> ,294.0751 [M+H-C <sub>2</sub> H <sub>2</sub> O] <sup>+</sup><br>290.0808 [M+H-CH <sub>2</sub> O <sub>2</sub> ] <sup>+</sup>                                                                         |
| 94  | 7.25 | Menisperine                    | C <sub>21</sub> H <sub>26</sub> NO <sub>4</sub>              | [M] <sup>+</sup>   | 356.1856 | 356.1857 | 0.28  | 311.1278 [M-C <sub>2</sub> H <sub>7</sub> N] <sup>+</sup> ,251.1064 [M-C <sub>4</sub> H <sub>11</sub> NO <sub>2</sub> ] <sup>+</sup>                                                                                                                                             |
| 95  | 7.35 | Demethyleneberberine glucoside | C <sub>25</sub> H <sub>28</sub> NO <sub>9</sub>              | [M] <sup>+</sup>   | 486.1758 | 486.1761 | 0.61  | 324.1226 [M-C <sub>6</sub> H <sub>10</sub> O <sub>5</sub> ] <sup>+</sup> ,308.0912 [M-CH <sub>4</sub> ] <sup>+</sup>                                                                                                                                                             |
| 96  | 7.47 | Demethyleneberberine           | C <sub>19</sub> H <sub>18</sub> NO <sub>4</sub> <sup>+</sup> | [M] <sup>+</sup>   | 324.1230 | 324.1230 | 0.00  | 309.0995 [M-CH <sub>3</sub> ] <sup>+</sup> ,294.0761 [M-C <sub>2</sub> H <sub>6</sub> ] <sup>+</sup> ,266.0815 [M-C <sub>3</sub> H <sub>6</sub> O] <sup>+</sup>                                                                                                                  |
| 97  | 7.58 | Berberrubine                   | C <sub>19</sub> H <sub>16</sub> NO <sub>4</sub> <sup>+</sup> | [M] <sup>+</sup>   | 322.1073 | 322.1073 | 0.00  | 307.0839 [M-CH <sub>3</sub> ] <sup>+</sup> ,294.1124 [M-CO] <sup>+</sup>                                                                                                                                                                                                         |
| 98  | 7.65 | Noroxyhydrastinine             | C <sub>10</sub> H <sub>9</sub> NO <sub>3</sub>               | [M+H] <sup>+</sup> | 192.0655 | 192.0656 | 0.52  | 149.0599 [M+H-CONH] <sup>+</sup>                                                                                                                                                                                                                                                 |
| 99  | 7.75 | Groenlandicine                 | C <sub>19</sub> H <sub>16</sub> NO <sub>4</sub> <sup>+</sup> | [M] <sup>+</sup>   | 322.1073 | 322.1074 | 0.31  | 307.0839 [M-CH <sub>3</sub> ] <sup>+</sup> ,294.1120 [M-CO] <sup>+</sup>                                                                                                                                                                                                         |
| 100 | 7.80 | 11-hydroxyl-groenlandicine     | C <sub>19</sub> H <sub>16</sub> NO <sub>5</sub> <sup>+</sup> | [M] <sup>+</sup>   | 338.1022 | 338.1021 | -0.29 | 322.0709 [M-CH <sub>4</sub> ] <sup>+</sup> ,310.0172 [M-CO] <sup>+</sup> ,306.0763 [M-CH <sub>4</sub> O] <sup>+</sup>                                                                                                                                                            |
| 101 | 8.00 | Oxyepiberberine                | C <sub>20</sub> H <sub>17</sub> NO <sub>5</sub>              | [M+H] <sup>+</sup> | 352.1179 | 352.1180 | 0.28  | 337.0945 [M+H-CH <sub>3</sub> ] <sup>+</sup> ,322.0711 [M+H-C <sub>2</sub> H <sub>6</sub> ] <sup>+</sup> ,308.0917 [M+H-C <sub>3</sub> H <sub>8</sub> ] <sup>+</sup><br>294.0745 [M+H-C <sub>3</sub> H <sub>6</sub> O] <sup>+</sup>                                              |
| 102 | 8.08 | Dihydropalmatine               | C <sub>21</sub> H <sub>23</sub> NO <sub>4</sub>              | [M+H] <sup>+</sup> | 354.1699 | 354.1693 | -1.69 | 339.1465 [M+H-CH <sub>3</sub> ] <sup>+</sup> ,338.1385 [M+H-CH <sub>4</sub> ] <sup>+</sup> ,324.1226 [M+H-C <sub>2</sub> H <sub>6</sub> ] <sup>+</sup><br>322.1438 [M+H-C <sub>2</sub> H <sub>8</sub> ] <sup>+</sup> ,310.0979 [M+H-C <sub>3</sub> H <sub>8</sub> ] <sup>+</sup> |
| 103 | 8.55 | Columbamine                    | C <sub>20</sub> H <sub>20</sub> NO <sub>4</sub> <sup>+</sup> | [M] <sup>+</sup>   | 338.1386 | 338.1387 | 0.29  | 323.1352 [M-CH <sub>3</sub> ] <sup>+</sup> ,322.1074 [M-CH <sub>4</sub> ] <sup>+</sup> ,308.0917 [M-C <sub>2</sub> H <sub>6</sub> ] <sup>+</sup><br>306.1130 [M-C <sub>2</sub> H <sub>8</sub> ] <sup>+</sup> ,294.1124 [M-C <sub>2</sub> H <sub>4</sub> O] <sup>+</sup>          |
| 104 | 8.64 | Epiberberine                   | C <sub>20</sub> H <sub>18</sub> NO <sub>4</sub> <sup>+</sup> | [M] <sup>+</sup>   | 336.1230 | 336.1229 | -0.30 | 321.0991 [M-CH <sub>3</sub> ] <sup>+</sup> ,320.0918 [M-CH <sub>4</sub> ] <sup>+</sup> ,306.0753 [M-C <sub>2</sub> H <sub>6</sub> ] <sup>+</sup><br>292.0966 [M-C <sub>2</sub> H <sub>4</sub> O] <sup>+</sup>                                                                    |
| 105 | 8.69 | Jatrorrhizine                  | C <sub>20</sub> H <sub>20</sub> NO <sub>4</sub> <sup>+</sup> | [M] <sup>+</sup>   | 338.1386 | 338.1385 | -0.30 | 323.1352 [M-CH <sub>3</sub> ] <sup>+</sup> ,322.1073 [M-CH <sub>4</sub> ] <sup>+</sup> ,308.0916 [M-C <sub>2</sub> H <sub>6</sub> ] <sup>+</sup><br>306.1127 [M-C <sub>2</sub> H <sub>8</sub> ] <sup>+</sup> ,294.1124 [M-C <sub>2</sub> H <sub>4</sub> O] <sup>+</sup>          |
| 106 | 8.75 | Coptisine                      | C <sub>19</sub> H <sub>14</sub> NO <sub>4</sub> <sup>+</sup> | [M] <sup>+</sup>   | 320.0917 | 320.0918 | 0.31  | 292.0966 [M-CO] <sup>+</sup>                                                                                                                                                                                                                                                     |
| 107 | 9.23 | 13-Methylepiberberine          | C <sub>21</sub> H <sub>20</sub> NO <sub>4</sub> <sup>+</sup> | [M] <sup>+</sup>   | 350.1386 | 350.1387 | 0.28  | 335.1153 [M-CH <sub>3</sub> ] <sup>+</sup> ,334.1073 [M-CH <sub>4</sub> ] <sup>+</sup> ,306.1121 [M-C <sub>2</sub> H <sub>4</sub> O] <sup>+</sup>                                                                                                                                |

|     |       |                        |                      |           |          |          |       |                                                                                                                                                                       |
|-----|-------|------------------------|----------------------|-----------|----------|----------|-------|-----------------------------------------------------------------------------------------------------------------------------------------------------------------------|
| 108 | 9.37  | Oxoglaucine            | $C_{20}H_{17}NO_5$   | $[M+H]^+$ | 352.1179 | 352.1174 | -1.41 | 337.0944 $[M+H-CH_3]^+$ , 322.0712 $[M+H-C_2H_6]^+$ , 320.0919 $[M+H-C_2H_8]^+$<br>308.0917 $[M+H-C_3H_8]^+$ , 307.0856 $[M+H-C_3H_9]^+$ , 294.0760 $[M+H-C_3H_6O]^+$ |
| 109 | 9.44  | Worenine               | $C_{20}H_{16}NO_4^+$ | $[M]^+$   | 334.1073 | 334.1073 | 0.00  | 319.0843 $[M-CH_3]^+$ , 306.1122 $[M-CH_4]^+$                                                                                                                         |
| 110 | 9.55  | Palmatine              | $C_{21}H_{22}NO_4^+$ | $[M]^+$   | 352.1543 | 352.1542 | -0.28 | 337.1307 $[M-CH_3]^+$ , 336.1229 $[M-CH_4]^+$ , 322.1074 $[M-C_2H_6]^+$<br>308.1281 $[M-C_3H_8]^+$                                                                    |
| 111 | 9.67  | Berberine              | $C_{20}H_{18}NO_4^+$ | $[M]^+$   | 336.1230 | 336.1230 | 0.00  | 321.0997 $[M-CH_3]^+$ , 320.0919 $[M-CH_4]^+$ , 306.0764 $[M-C_2H_6]^+$<br>292.0969 $[M-C_2H_4O]^+$ , 278.0805 $[M-C_3H_6O]^+$                                        |
| 112 | 10.12 | Dehydrocorydaline      | $C_{22}H_{24}NO_4^+$ | $[M]^+$   | 366.1699 | 366.1701 | 0.55  | 351.1465 $[M-CH_3]^+$ , 336.1228 $[M-C_2H_6]^+$ , 334.1432 $[M-C_2H_8]^+$<br>322.1437 $[M-C_3H_8]^+$                                                                  |
| 113 | 10.37 | 13-Methylberberin<br>e | $C_{21}H_{20}NO_4^+$ | $[M]^+$   | 350.1386 | 350.1387 | 0.29  | 335.1151 $[M-CH_3]^+$ , 334.1073 $[M-CH_4]^+$ , 320.0916 $[M-C_2H_6]^+$<br>306.1125 $[M-C_2H_4O]^+$                                                                   |
| 114 | 11.47 | Acacetin               | $C_{16}H_{12}O_5$    | $[M+H]^+$ | 285.0757 | 285.0757 | 0.00  | 270.0521 $[M+H-CH_3]^+$ , 242.0574 $[M+H-C_2H_3O]^+$ , 211.0756 $[M+H-C_2H_2O_3]^+$                                                                                   |
| 115 | 14.81 | Oxyberberine           | $C_{20}H_{17}NO_5$   | $[M+H]^+$ | 352.1179 | 352.1180 | 0.28  | 337.0945 $[M+H-CH_3]^+$ , 322.0712 $[M+H-C_2H_6]^+$ , 308.0923 $[M+H-C_3H_8]^+$<br>294.0766 $[M+H-C_3H_6O]^+$                                                         |
| 116 | 16.45 | Candicine              | $C_{11}H_{18}NO^+$   | $[M+H]^+$ | 180.1382 | 180.1382 | 0.00  | 121.0646 $[M+H-C_3H_9N]^+$ , 105.0700 $[M+H-C_3H_9NO]^+$                                                                                                              |
| 117 | 17.49 | Linoleic acid          | $C_{18}H_{32}O_2$    | $[M+H]^+$ | 281.2475 | 281.2476 | 0.35  | 263.2370 $[M+H-H_2O]^+$ , 197.1540 $[M+H-C_6H_{12}]^+$                                                                                                                |
| 118 | 19.40 | Eleostearic acid       | $C_{18}H_{30}O_2$    | $[M+H]^+$ | 279.2318 | 279.2318 | 0.00  | 261.2212 $[M+H-H_2O]^+$ , 109.1016 $[M+H-C_{10}H_{18}O_2]^+$                                                                                                          |
| 119 | 25.36 | Palmitic acid          | $C_{16}H_{32}O_2$    | $[M+H]^+$ | 257.2475 | 257.2475 | 0.00  | 239.2369 $[M+H-H_2O]^+$                                                                                                                                               |

A

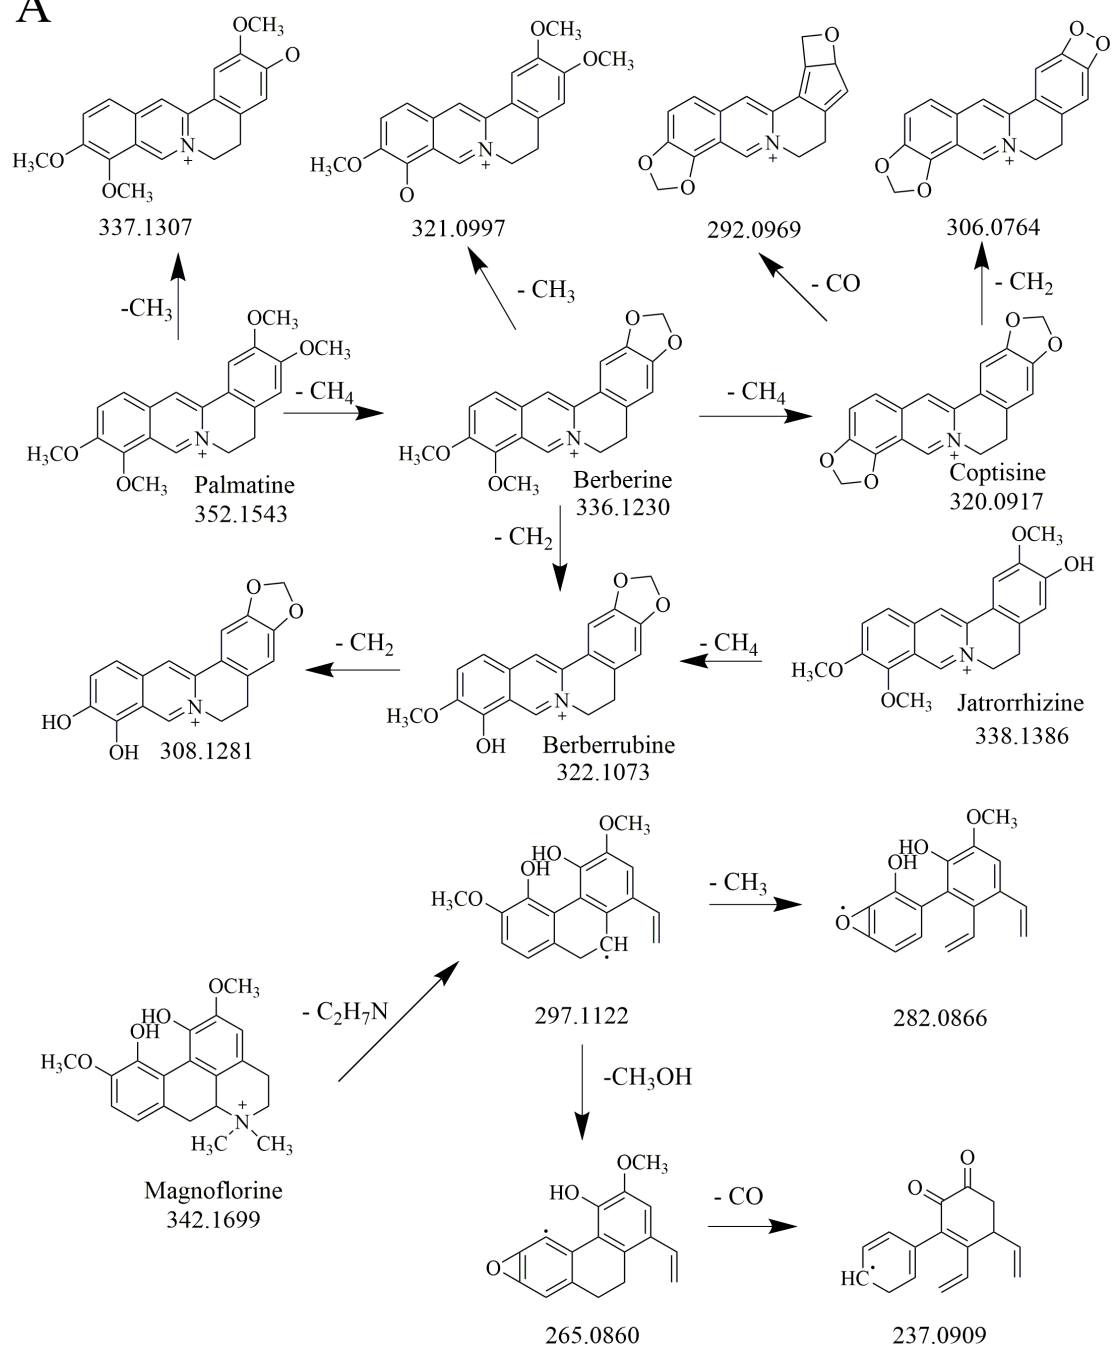

B

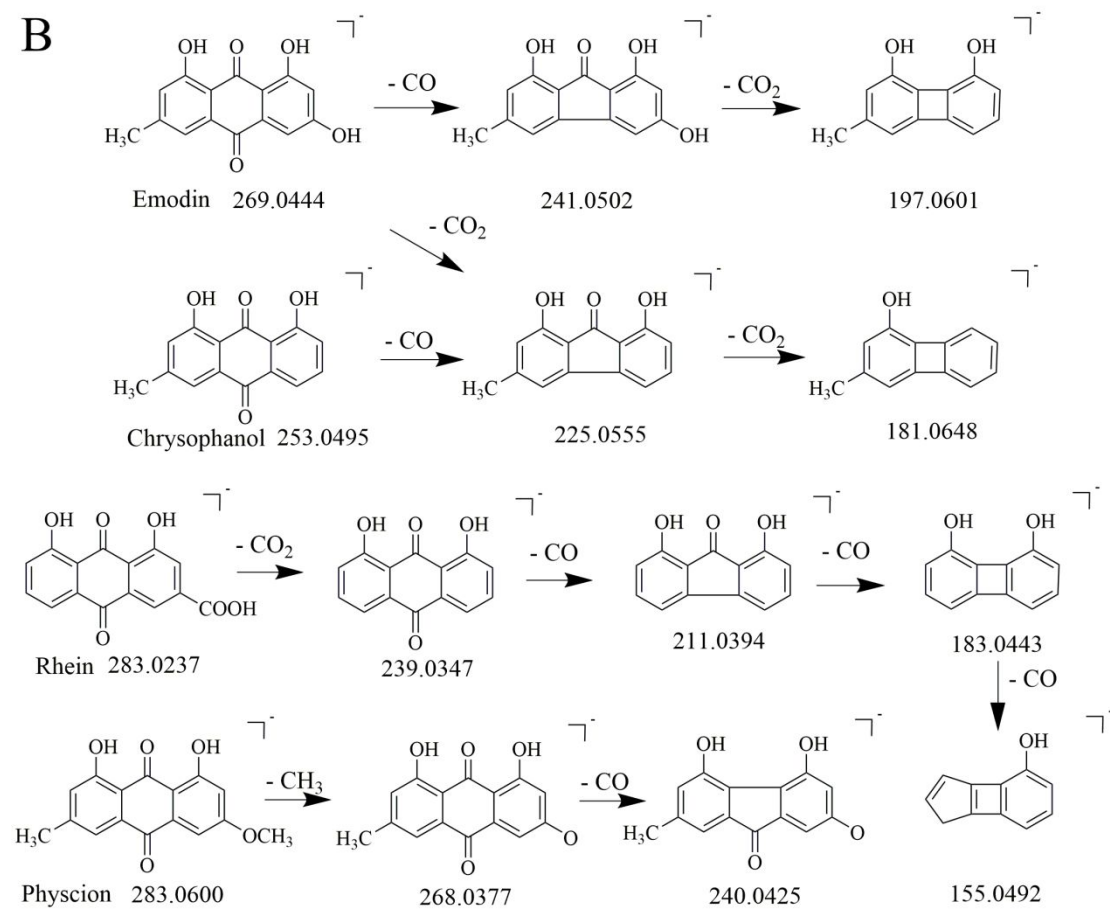

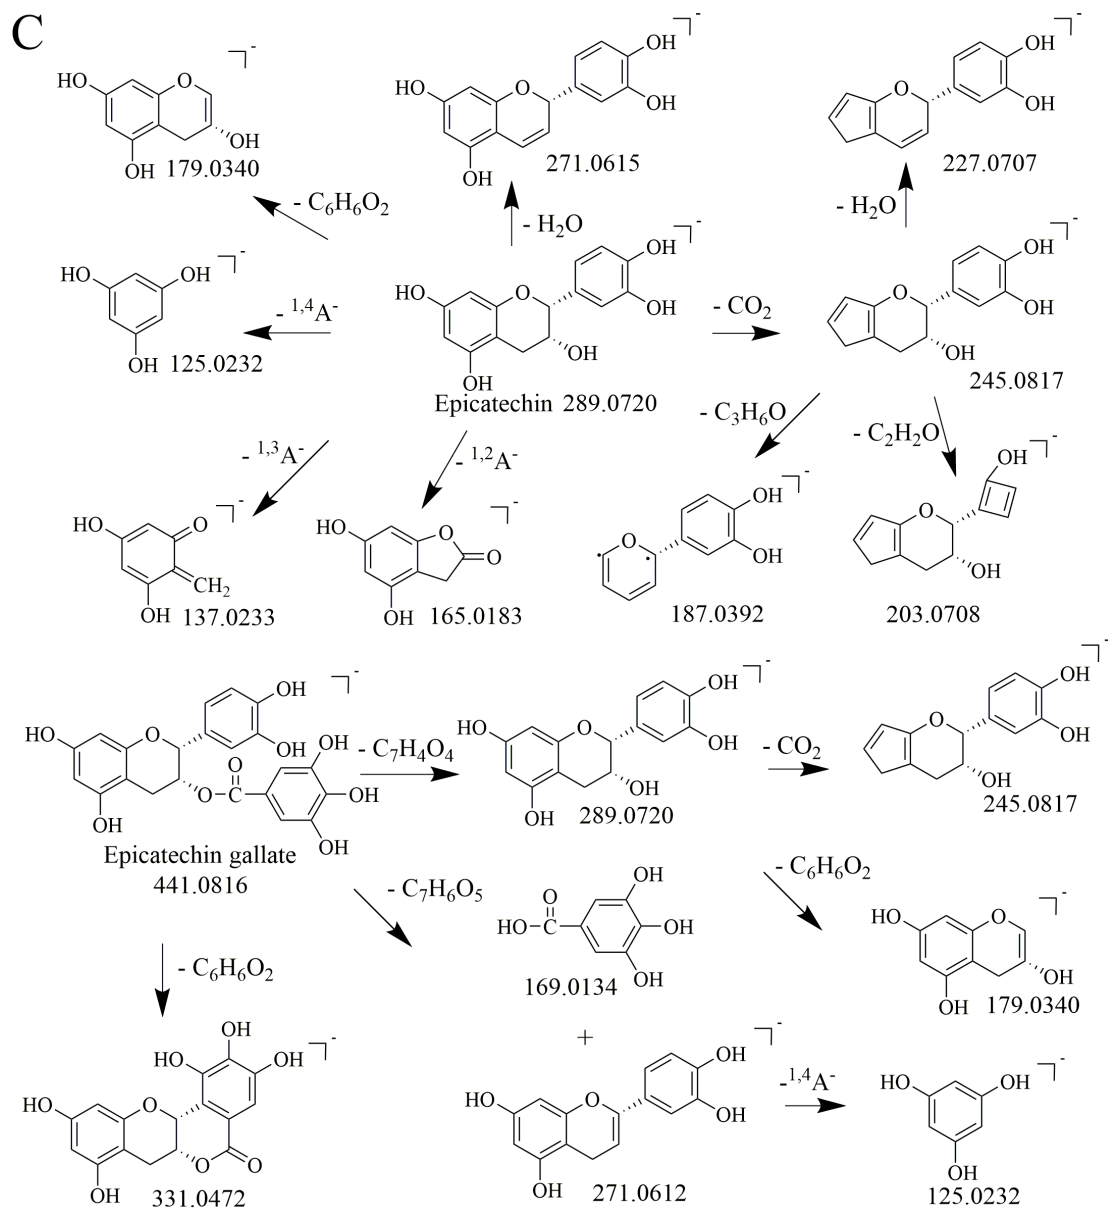

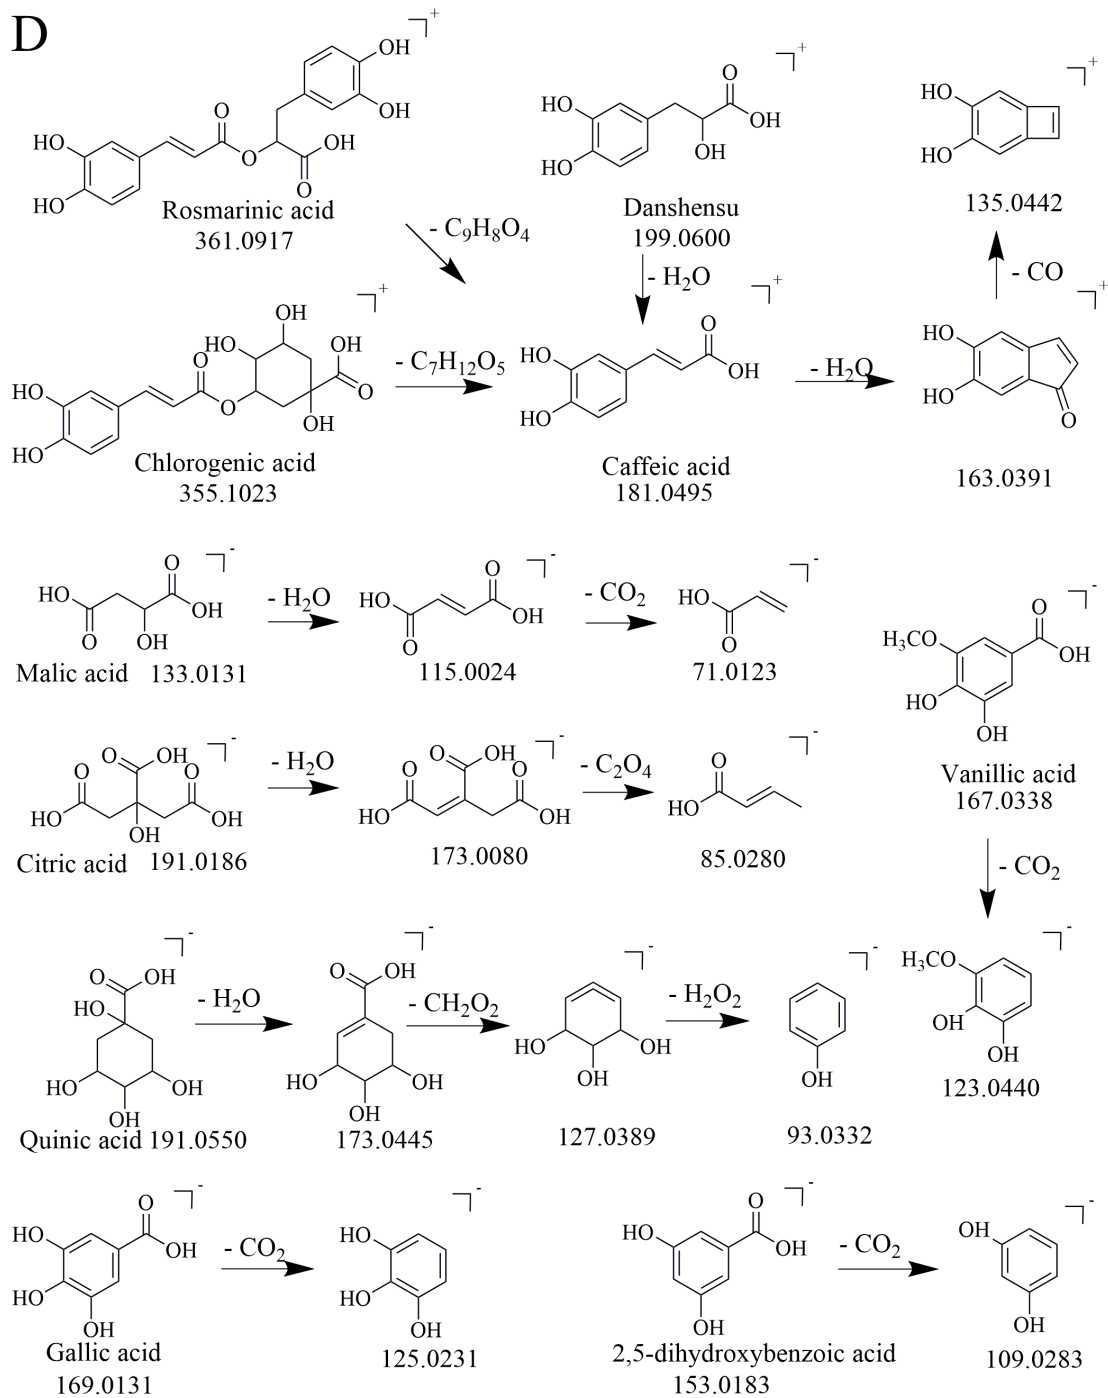

**Figure S1.** The cracking law of compounds (A) Alkaloids, (B) Anthraquinones, (C) Tannins, (D) Organic acids.
